# Supplementary material for: Construction of a photoactive supramolecular system based on a platinum(ii) bis-acetylide building block incorporated into a ruthenium(ii) polypyridyl complex
Source: Royal Society of Chemistry journal article supplement (doi:10.1039/b914794b), 2009-12-17
Supplement: b914794b.pdf [file b914794b.pdf]

## Electronic supplementary information

### **Construction of photoactive supramolecular wire based on a platinum(II) bis-acetylide building block incorporated into a ruthenium(II) polypyridyl complex**

Michito Shiotsuka,<sup>\*</sup> Naoki Nishiko, Kazutoshi Keyaki, Koichi Nozaki

## Experimental Section

### *Measurements*

Emission spectra at 77 K were measured with a HAMAMATSU C7473 photonic multi-channel analyzer and using a liquid nitrogen in a quartz Dewar upon excitation at 425 nm. All emission spectra at 77 K were measured in a degassed ethanol by freeze-pump-thaw (4 times).

## Figures

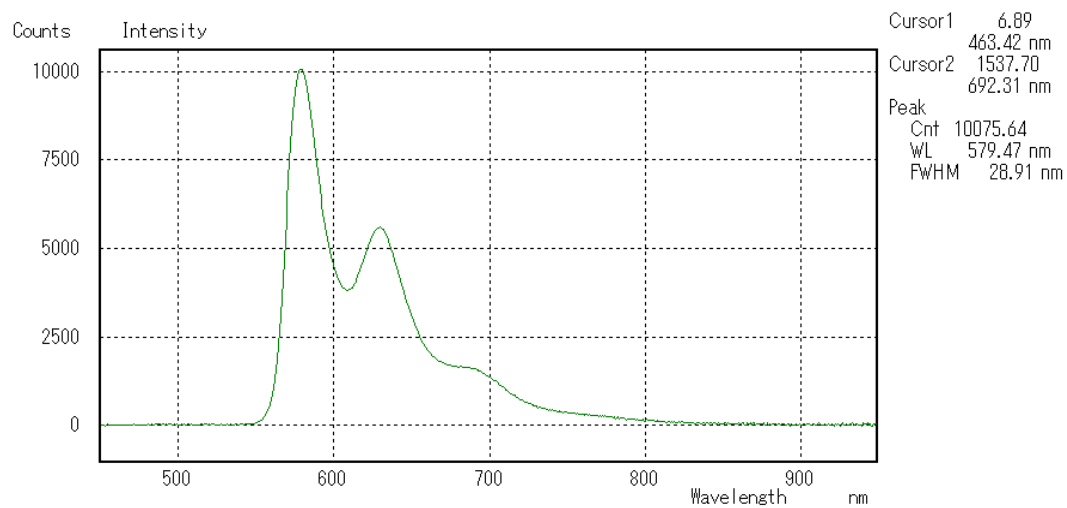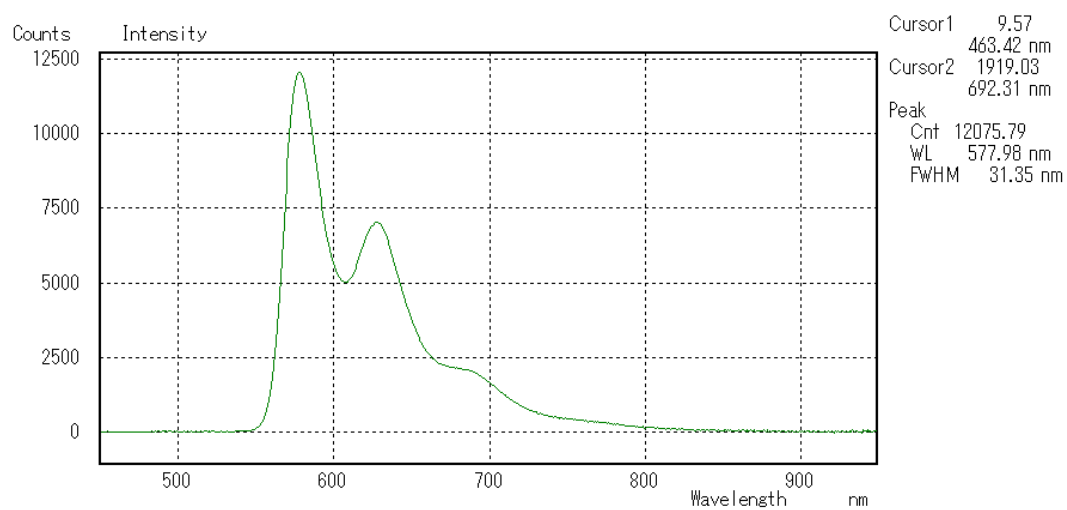

**Figure S1.** Emission spectra of **1** (upper) and **3** (lower) in the degassed EtOH at 77 K.

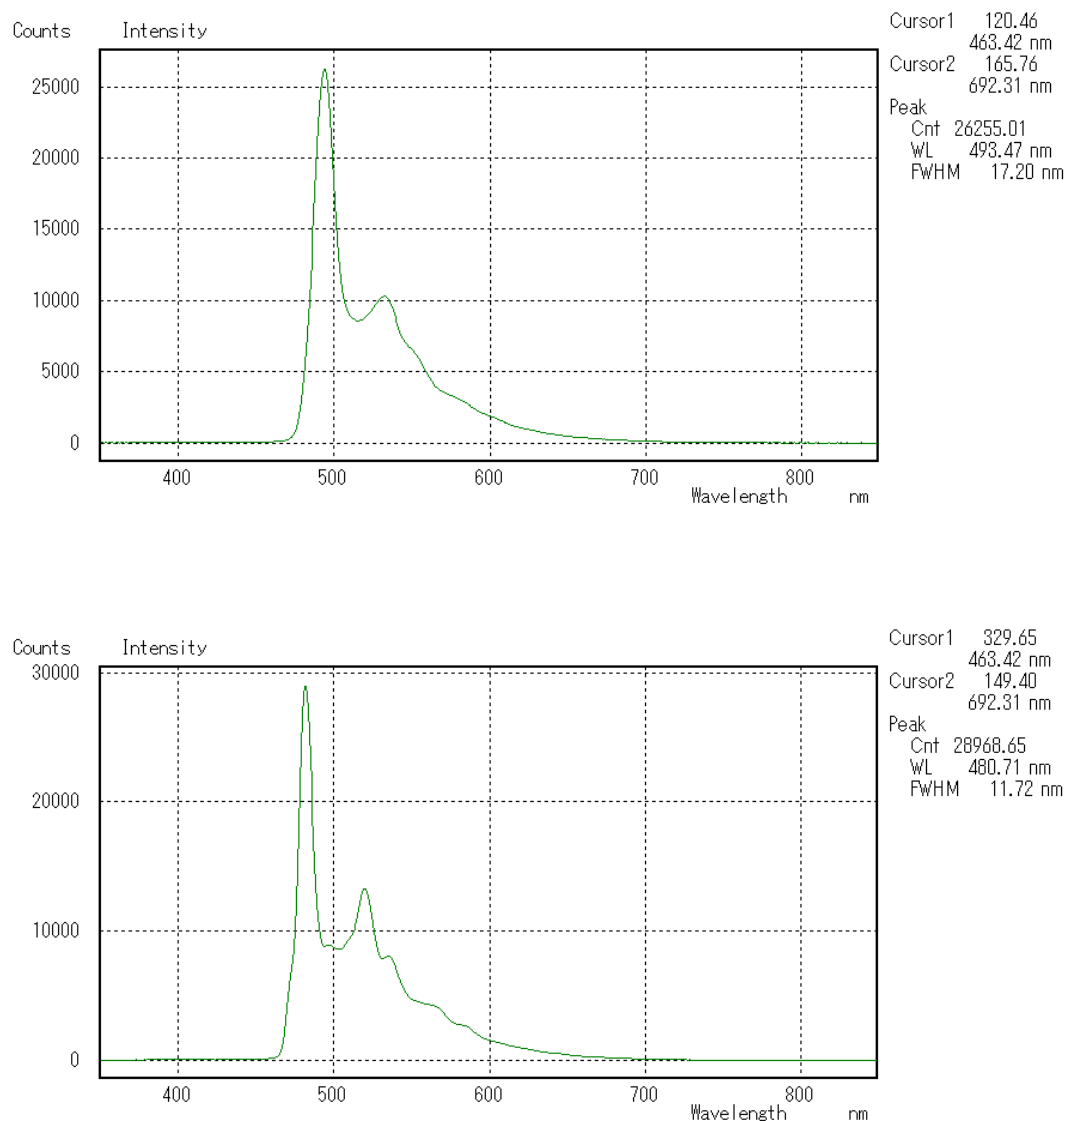

**Fig. S2.** Emission spectra of **2** (upper) and **4** (lower) in the degassed EtOH at 77 K.
